# Supplementary material
Source: publisher site journal article supplement (https://www.dovepress.com/article/407683)
Supplement: Supplementary file 1 [file get_supplementary_file.php]

**Appendix A. Literature Review Extraction Table**

A structured literature review was conducted in PubMed and Google Scholar for articles published in English between January 2016 and June 15, 2021 (date of search). This search was complemented by searches of publications from relevant organizations and reference lists. The following search terms were used:

- (thrombos* OR thrombocytopenia OR thrombot*) AND (ICD OR claim* or positive predictive value OR PPV OR valid*)

Two validation studies of particular relevance were identified,1,2 while additional studies using claims data to identify thrombosis and thrombocytopenia are summarized in **Table A1**. Liberman and colleagues used ICD-9 codes 325.0, 437.6, and 671.5 to identify patients with cerebral venous thrombosis (n=111), reporting a positive predictive value (PPV) of 83.8% (95% CI 68.5­–92.7%) for codes in the primary position and 75.7% (95% CI 66.9–82.8) for codes in any position.2 Handley and Emsley used ICD-10-CM codes G08, I67.6, I63.6, O22.5x, and O87.3 to identify intracranial venous thrombosis in the US (n=65), reporting a PPV of 92.3% (95% CI 82.8–97.1%) for codes in any position.1 It should be noted that, while the description of the G08 ICD-10 code is indicative of phlebitis and not necessarily thrombosis, it was the most prevalent code found that was indicative of intracranial venous thrombosis (59 of 65 cases) and had a high PPV of 91.5%; it was based on these findings and our clinicians’ guidance that this code was included in the algorithm.

**Supplementary Table A1.** Summary of Included Studies

| **Citation** | **Title** | **Country** | **Summary** | **Disease Definition** | **Algorithm/Criteria** | **Validity** |
| --- | --- | --- | --- | --- | --- | --- |
| Handley & Emsley, 20201 | Validation of ICD-10 codes shows intracranial venous thrombosis incidence to be higher than previously reported | United States | Used ICD-10-CM codes to identify intracranial venous thrombosis (ICVT) and conducted a validation | Radiological evidence was the gold standard for diagnosis and confirmation of ICVT | ICD-10-CM codes (any position) G08, I67.6, I63.6, O22.5x, and O87.3 | Across 65 patient records: PPV of 92.3% (95% CI 82.8–97.1%) |
| Liberman et al., 20162 | International Classification of Diseases, Ninth Revision (ICD-9) Diagnosis Codes Can Identify Cerebral Venous Thrombosis in Hospitalized Adults | United States | Used ICD-9-CM to identify cerebral venous thrombosis (CVT) and conducted a validation | Cases were adjudicated by chart review | ICD-9-CM codes (any position) 325.0, 437.6, and 671.5 in the emergency department or following inpatient admission | Any position (n=111): PPV of 75.7% (95% CI 66.9–82.8)  Primary position: 83.8% (95% CI 68.5­–92.7%) |
| McKeigue et al., 20213 | Association of cerebral venous thrombosis with recent COVID-19 vaccination: case-crossover study using ascertainment through neuroimaging in Scotland | Scotland | Used ICD-10 codes to assess the association between CVT and COVID-19 vaccination | No validation was conducted | I63.6, I67.6, and G08 | No validation was conducted |
| Pottegard, 20214 | Arterial events, venous thromboembolism, thrombocytopenia, and bleeding after vaccination with Oxford-AstraZeneca ChAdOx1-S in Denmark and Norway: population-based cohort study. | Denmark and Norway | Used ICD-10 codes to assess the incidence of cardiovascular and haemostatic events in the first 28 days after vaccination with the Oxford-AstraZeneca vaccine ChAdOx1-S and to compare them with rates observed in the general populations. | No validation was conducted | ICD-10-based outcome definitions included in **Appendix Table B1** | No validation was conducted |
| Prieto-Alhambra, 20215 | Natural history of coagulopathy and use of anti-thrombotic agents in COVID-19 patients and persons vaccinated against SARS-CoV-2 | UK, Germany, France, Spain,  Italy | Used routinely-collected healthcare data from databases throughout Europe were used to identify incidence of thromboembolic events and co-occurrence with thrombocytopenia (Thrombosis-thrombocytopenia syndromes (TTS)) in the general population and in persons vaccinated against SARS-CoV-2 at 7, 14, 21, and 28 days  Co-occurrence was defined as thrombocytopenia identified/recorded within 10 days before/after the diagnosis of the thrombotic event. | No validation was conducted | ICD-9, ICD-10 and ICD-10-CM-based outcome definitions included in **Appendix Table B2** | No validation was conducted |

Pottegard and colleagues4 outline the following definitions for events of interest:

- Arterial vascular events:
  - Cardiac events: I21 (AMI), I20, I23–25 (ischaemic heart disease without AMI)
  - Cerebrovascular events: I60 (subarachnoid hemorrhage, I61 (intracerebral hemorrhage), I62 (unspecified nontraumatic intracranial hemorrhage), I62 (cerebral infarction), I63.6 (cerebral infarction due to cerebral venous thrombosis, nonpyogenic), I64 (stroke, unspecified), I65-66 (occlusion/stenosis of precerebral or cerebral arteries, not resulting in cerebral infarction), G45.0–45.3 (transitory cerebral ischemic attack)
  - Other necrotizing vasculitis: M31 (other necrotizing vasculitis), M31.0 (angiitis hypersensitive), M31.1 (microangiopathia thrombotica), M31.8 (other necrotizing vasculitis)
- Venous thromboembolism events
  - Pulmonary embolism: I26 (pulmonary embolism)
  - Lower limb venous thromboembolism: I80.1 (thrombophlebitis of femoral vein), I80.2 (deep thrombophlebitis of veins in leg), I80.3 (unspecified deep thrombophlebitis in lower limb)
  - Splanchnic thrombosis: I81 (portal thrombosis), I82.0 (Budd-Chiari syndrome), I82.3 (embolism and thrombosis in renal vein)
  - Cerebral venous thrombosis: I67.6 (nonpyogenic cerebral venous thrombosis)
  - Other venous thrombosis: I82.2 (embolism and thrombosis of caval vein), I82.8 (embolism and thrombosis in other specified veins), I82.9 (embolism and thrombosis in non-specified veins)
- Thrombocytopenia and coagulative disorders
  - Coagulative disorders: D65+69 (coagulation disorders, purpura), D65 (disseminated intravascular coagulation)
  - Thrombocytopenia: D69.3–69.6 (thrombocytopenia), D69.3 (idiopathic thrombocytopenic purpura), D69.4 (other primary thrombocytopenia), D69.5 (secondary thrombocytopenia), D69.6 (thrombocytopenia unspecified)
- Bleeding events
  - Haemolytic anemias: D55–57+59 (haemolytic anemias), D59.3 (haemolytic uremic syndrome), D59.5 (paroxysmal nocturnal hemoglobinuria)
  - Bleedings: D62 (anemias from bleeding), D62.9 (anemia from bleeding, unspecified), K92.2 (intestinal bleeding), R04 (bleeding from respiratory tract), R31 (haematuria), R58 (bleeding, not specified)

Prieto-Alhambra and colleagues4 outline the following definitions for events of interest (**Table A2** and **A3**):

| **Supplementary Table A2.** ICD-9, ICD-10, ICD-10-CM codes used by Prieto-Alhambra and colleagues4 to identify thrombotic events of interest | | |
| --- | --- | --- |
| **Outcome** | **Coding System** | **Code** |
| **Hepatic Vein Thrombosis** | | |
| Budd-Chiari syndrome | ICD-10 | I82.0 |
| Budd-Chiari syndrome | ICD-9-CM | 453 |
| Budd-Chiari syndrome | ICD-10-CM | I82.0 |
| **Portal Vein Thrombosis** | | |
| Portal vein thrombosis | ICD-10 | I81 |
| Portal vein thrombosis | ICD-10-CM | I81 |
| Portal vein thrombosis | ICD-9-CM | 452 |
| **Splanchnic Vein Thrombosis** | | |
| Portal vein thrombosis | ICD-10 | I81 |
| Budd-Chiari syndrome | ICD-10 | I82.0 |
| Portal vein thrombosis | ICD-9-CM | 452 |
| Budd-Chiari syndrome | ICD-9-CM | 453 |
| Budd-Chiari syndrome | ICD-10-CM | I82.0 |
| Portal vein thrombosis | ICD-10-CM | I81 |
| **Visceral Venous Thrombosis** | | |
| Embolism and thrombosis of abdominal aorta | ICD-10 | I74.0 |
| Budd-Chiari syndrome | ICD-10 | I82.0 |
| Embolism and thrombosis of renal vein | ICD-10 | I82.3 |
| Embolism and thrombosis of renal vein | ICD-10-CM | I82.3 |
| Budd-Chiari syndrome | ICD-10-CM | I82.0 |
| Other arterial embolism and thrombosis of abdominal aorta | ICD-10-CM | I74.09 |
| **Cerebral Venous Thrombosis** | | |
| Nonpyogenic thrombosis of intracranial venous system | ICD-10 | I67.6 |
| Cerebral infarction due to cerebral venous thrombosis, nonpyogenic | ICD-10 | I63.6 |
| Nonpyogenic thrombosis of intracranial venous sinus | ICD-9-CM | 437.6 |
| Nonpyogenic thrombosis of intracranial venous system | ICD-10-CM | I67.6 |
| Cerebral infarction due to cerebral venous thrombosis, nonpyogenic | ICD-10-CM | I63.6 |
| Cerebral venous sinus thrombosis |  |  |
| Nonpyogenic thrombosis of intracranial venous system | ICD-10 | I67.6 |
| Cerebral infarction due to cerebral venous thrombosis, nonpyogenic | ICD-10 | I63.6 |
| Nonpyogenic thrombosis of intracranial venous sinus | ICD-9-CM | 437.6 |
| Nonpyogenic thrombosis of intracranial venous system | ICD-10-CM | I67.6 |
| Cerebral infarction due to cerebral venous thrombosis, nonpyogenic | ICD-10-CM | I63.6 |
| **Venous Thromboembolism - Broad** | | |
| Phlebitis and thrombophlebitis of lower extremities, unspecified | ICD-10 | I80.3 |
| Phlebitis and thrombophlebitis of unspecified site | ICD-10 | I80.9 |
| Embolism and thrombosis of vena cava* | ICD-10 | I82.2 |
| Phlebitis and thrombophlebitis of femoral vein | ICD-10 | I80.1 |
| Thrombophlebitis migrans | ICD-10 | I82.1 |
| Phlebitis and thrombophlebitis of other deep vessels of lower extremities* | ICD-10 | I80.2 |
| Phlebitis and thrombophlebitis of other sites | ICD-10 | I80.8 |
| Phlebitis and thrombophlebitis of other (or unspecified) deep vessels of left, right, bilateral or unspecified lower extremity * | ICD-10-CM | I80.201-3,9; I80.291-3,9 |
| Acute (or chronic) embolism and thrombosis of superior (or inferior) vena cava * | ICD-10-CM | I82.210-1; I82.220-1 |
| Phlebitis and thrombophlebitis of left, right or unspecified femoral vein | ICD-10-CM | I80.10-2 |
| Acute embolism and thrombosis of left, right, bilateral or unspecified iliac vein * | ICD-10-CM | I82.421-3,9 |
| Acute (or chronic) embolism and thrombosis of unspecified vein | ICD-10-CM | I82.90-1 |
| Acute (or chronic) embolism and thrombosis of other specified veins | ICD-10-CM | I82.890-1 |
| Chronic embolism and thrombosis of vein in left, right or unspecified lower extremity * | ICD-10-CM | I82.591,2,9 |
| Acute embolism and thrombosis of left, right, bilateral or unspecified deep veins of left lower extremity * | ICD-10-CM | I82.401-3,9 |
| Acute embolism and thrombosis of other specified deep vein of left, right, bilateral or unspecified lower extremity * | ICD-10-CM | I82.491-3,9 |
| Chronic embolism and thrombosis of unspecified deep veins of right, bilateral or unspecified lower extremity * | ICD-10-CM | I82.501,3,9 |
| Embolism and thrombosis of superficial veins of left, right, bilateral or unspecified lower extremity * | ICD-10-CM | I82.811-3,9 |
| Chronic embolism and thrombosis of unspecified deep veins of left or right proximal lower extremity * | ICD-10-CM | I82.5Y1-2 |
| Acute embolism and thrombosis of unspecified deep veins of left, right, bilateral, or unspecified distal lower extremity * | ICD-10-CM | I82.4Z1-3,9 |
| Acute embolism and thrombosis of unspecified deep veins of left, right, bilateral or unspecified proximal lower extremity* | ICD-10-CM | I82.4Y1-3,9 |
| Acute embolism and thrombosis of deep veins of left, right or unspecified upper extremity * | ICD-10-CM | I82.621,2,9 |
| Acute embolism and thrombosis of left, right, bilateral or unspecified popliteal vein * | ICD-10-CM | I82.431-3,9 |
| Acute embolism and thrombosis of left, right or bilateral tibial vein * | ICD-10-CM | I82.441-3 |
| Acute embolism and thrombosis of left, right, bilateral, or unspecified femoral vein | ICD-10-CM | I82.411-3,9 |
| Acute embolism and thrombosis of left, right or unspecified axillary vein * | ICD-10-CM | I82.A11,2,9 |
| Acute embolism and thrombosis of left, right, bilateral or unspecified internal jugular vein* | ICD-10-CM | I82.C11-3,9 |
| Acute embolism and thrombosis of left, right, bilateral or unspecified subclavian vein* | ICD-10-CM | I82.B11-3,9 |
| * Included in narrow outcome definition |  |  |

| **Supplementary Table A3.** ICD-9, ICD-10, ICD-10-CM codes used by Prieto-Alhambra and colleagues4 to identify thrombocytopenia outcomes | | |
| --- | --- | --- |
| **Outcome** | **Coding System** | **Code** |
| **Immune Thrombocytopenia** | | |
| Idiopathic thrombocytopenic purpura | ICD-10 | D69.3 |
| Heparin induced thrombocytopenia (HIT) | ICD-10-CM | D75.82 |
| Evans syndrome | ICD-10-CM | D69.41 |
| **Throbocytopenic Purpura** | | |
| Idiopathic thrombocytopenic purpura | ICD-10 | D69.3 |
| Thrombotic microangiopathy | ICD-10 | M31.1 |
| Thrombotic microangiopathy | ICD-9-CM | 446.6 |
| **Thrombotic Thrombocytopenia Purpura** | | |
| Haemolytic-uraemic syndrome | ICD-10 | D59.3 |
| Thrombotic microangiopathy | ICD-10 | M31.1 |
| Thrombotic microangiopathy | ICD-9-CM | 446.6 |
| Hemolytic-uremic syndrome | ICD-9-CM | 283.11 |

**Appendix B. ICD-10-CM Algorithm for Thrombosis with Thrombocytopenia Syndrome (TTS) at Unusual Sites**

**Supplementary Table B1:** Algorithm component 1 (unusual site thrombosis): Requires ≥1 ICD-10-CM diagnosis code indicating unusual site thrombosis (intracranial venous thrombosis OR intraabdominal venous thrombosis). While not specific to intraabdominal venous thrombosis, the I82.890 code is indicated to diagnose splenic vein thrombosis, and other splanchnic vein thromboses.

| **Code** | **Code Description** | **Coding System** | **Thrombosis Type** |
| --- | --- | --- | --- |
| I67.6 | Nonpyogenic thrombosis of intracranial venous system | ICD-10-CM | Intracranial venous thrombosis |
| I63.6 | Cerebral infarction due to cerebral venous thrombosis, nonpyogenic | ICD-10-CM | Intracranial venous thrombosis |
| O22.50 | Cerebral venous thrombosis in pregnancy, unspecified trimester | ICD-10-CM | Intracranial venous thrombosis |
| O22.51 | Cerebral venous thrombosis in pregnancy, first trimester | ICD-10-CM | Intracranial venous thrombosis |
| O22.52 | Cerebral venous thrombosis in pregnancy, second trimester | ICD-10-CM | Intracranial venous thrombosis |
| O22.53 | Cerebral venous thrombosis in pregnancy, third trimester | ICD-10-CM | Intracranial venous thrombosis |
| O87.3 | Cerebral venous thrombosis in the puerperium | ICD-10-CM | Intracranial venous thrombosis |
| G08 | Intracranial and intraspinal phlebitis and thrombophlebitis | ICD-10-CM | Intracranial venous thrombosis |
| I82.890 | Acute embolism and thrombosis of other specified veins | ICD-10-CM | Intraabdominal venous thrombosis |
| I81 | Portal vein thrombosis | ICD-10-CM | Intraabdominal venous thrombosis |
| I82.0 | Budd-Chiari Syndrome | ICD-10-CM | Intraabdominal venous thrombosis |
| I82.3 | Embolism and thrombosis of renal vein | ICD-10-CM | Intraabdominal venous thrombosis |

**Supplementary Table B2:** Algorithm component 2 (thrombocytopenia): Requires ≥1 ICD-10-CM diagnosis code indicating thrombocytopenia within 14 days of an unusual site thrombosis diagnosis code (algorithm component 1).

| **Code** | **Code Description** | **Coding System** |
| --- | --- | --- |
| D69.3 | Immune thrombocytopenic purpura | ICD-10-CM |
| D69.49 | Other primary thrombocytopenia | ICD-10-CM |
| D69.59 | Other secondary thrombocytopenia | ICD-10-CM |
| M31.1 | Thrombotic microangiopathy | ICD-10-CM |
| D75.82 | Heparin induced thrombocytopenia (HIT) | ICD-10-CM |
| D69.6 | Thrombocytopenia, unspecified | ICD-f10-CM |

**Appendix C. Algorithm validation results, with thrombosis and thrombocytopenia evaluated as independent events**

**Supplementary Table C1. Algorithm validation results, with thrombosis and thrombocytopenia evaluated as independent events**

| **Metric** | **All patients identified with unusual site TTS** | **Patients with incident intraabdominal venous thrombosis and co-occurring thrombocytopenia diagnoses** | | | | | **Patients with incident intracranial venous thrombosis and co-occurring thrombocytopenia diagnoses** | | |
| --- | --- | --- | --- | --- | --- | --- | --- | --- | --- |
| **First recorded ICD-10-CM diagnosis codea for thrombosis** | **Total** | **I81** | **I82.890** | **I82.0** | **I82.3** | **Total** | **G08** | **I67.6** |
| **Total patients selected for validation, N** | **117** | **106** | **50** | **39** | **10** | **7** | **11** | **9** | **2** |
| **Thrombosis diagnosis** |  |  |  |  |  |  |  |  |  |
| Imaging report available,  n (%)b | 115 (98.3%) | 104 (98.1%) | 50 (100%) | 38 (97.4%) | 10 (100.0%) | 6 (85.7%) | 11 (100%) | 9 (100.0%) | 2 (100%) |
| **Thrombosis diagnosis percent agreement**, numerator/denominator | **87/115** | **76/104** | **48/50** | **15/38** | **8/10** | **5/6** | **11/11** | **9/9** | **2/2** |
| **Thrombosis diagnosis percent agreement**, % (95% CI) | **75.7%**  **(66.8–82.8%)** | **73.1% (63.6–80.8%)** | **96.0%  (88.5–99.7%)** | **39.5% (25.3–55.6%)** | **80.0% (47.3–95.6%)** | **83.3% (41.0–99.0%)** | **100.0% (69.9%–100.0%)** | **100.0% (64.6%–100.0%)** | **100.0% (28.2%–100.0%)** |
| No current evidence of intracranial or intraabdominal thrombosis, %c | 10/115 (8.7%) | 10/104 (9.6%) | 1/50 (2.0%) | 6/38 (15.8%) | 2/10 (20.0%) | 1/6 (16.7%) | 0/11 (0.0%) | 0/9 (0.0%) | 0/2 (0.0%) |
| Other non-intraabdominal, non-intracranial thrombosis confirmed by imaging, %d | 18/115 (15.7%) | 18/104 (17.3%) | 1/50 (2.0%) | 17/38 (44.7%) | 0/10 (0.0%) | 0/6 (0.0%) | 0/11 (0.0%) | 0/9 (0.0%) | 0/2 (0.0%) |
| **Thrombocytopenia diagnosis** |  |  |  |  |  |  |  |  |  |
| Platelet count results available, n (%)e | 115 (98.3%) | 104 (98.1%) | 49 (98.0%) | 39 (100.0%) | 10 (100.0%) | 6 (85.7%) | 11  (100%) | 9  (100.0%) | 2  (100.0%) |
| **Thrombocytopenia diagnosis percent agreement,** numerator/denominator | **112/115** | **101/104** | **48/49** | **38/39** | **10/10** | **5/6** | **11/11** | **9/9** | **2/2** |
| **Thrombocytopenia diagnosis percent agreement,** % (95% CI) | **98.3%**  **(92.1–99.5%)** | **97.1% (91.3–99.4%)** | **98.0%**  **(88.0–100.0%)** | **97.4%**  **(85.3–100.0%)** | **100.0%**  **(67.0–100.0%)** | **83.3%**  **(41.0–99.0%)** | **100.0%**  **(69.9%–100.0%)** | **100.0% (64.6%–100.0%)** | **100.0% (28.2%–100.0%)** |

Acronyms:95% CI, 95% confidence interval; ICD-10-CM, International Classification of Diseases, Tenth Revision, Clinical Modification; μL, microliter.

a Codes: I81, portal vein thrombosis; I82,890, acute embolism and thrombosis of other specified veins; I82.0, Budd-Chiari syndrome; I82.3, embolism and thrombosis of renal vein; G08, intracranial and intraspinal phlebitis and thrombophlebitis; I67.6, nonpyogenic thrombosis of intracranial venous system.

b Thrombosis diagnoses were confirmed by pathology or imaging report. Qualifying imaging reports within +/-14 days of the incident thrombosis diagnosis are ultrasound–Doppler, computed tomography (CT scan), magnetic resonance imaging (MRI) including magnetic resonance venography (MRV), perfusion V/Q scan, conventional angiography, or digital subtraction angiography. Imaging reports contain radiologist’s interpretation of imaging, as well as all clinical notes pertaining to the diagnosis.

c Among patients with a qualifying imaging report, these patients had a confirmatory rule-out of any venous thrombosis.

d Among patients with a qualifying imaging report, these patients had a confirmatory diagnosis of other non-intraabdominal, non-intracranial venous thrombosis.

e Thrombocytopenia diagnoses were confirmed by a platelet count <150,000/μL. This requires at least one interpretable platelet count laboratory test result within +/-14 days of the incident thrombocytopenia diagnosis.

**References**

1. Handley JD, Emsley HC. Validation of ICD-10 codes shows intracranial venous thrombosis incidence to be higher than previously reported. *Health Inf Manag*. Jan 2020;49(1):58-61. doi:10.1177/1833358318819105

2. Liberman AL, Kamel H, Mullen MT, Messé SR. International Classification of Diseases, Ninth Revision (ICD-9) Diagnosis Codes Can Identify Cerebral Venous Thrombosis in Hospitalized Adults. *Neurohospitalist*. Oct 2016;6(4):147-150. doi:10.1177/1941874416648198

3. McKeigue PM, Burgul R, Bishop J, et al. Association of cerebral venous thrombosis with recent COVID-19 vaccination: case-crossover study using ascertainment through neuroimaging in Scotland. *BMC Infectious Diseases*. 2021/12/20 2021;21(1):1275. doi:10.1186/s12879-021-06960-5

4. Pottegård A, Lund LC, Karlstad Ø, et al. Arterial events, venous thromboembolism, thrombocytopenia, and bleeding after vaccination with Oxford-AstraZeneca ChAdOx1-S in Denmark and Norway: population based cohort study. *BMJ*. 2021;373:n1114. doi:10.1136/bmj.n1114

5. Prieto-Alhambra D, Burn E. *Natural history of coagulopathy and use of anti-thrombotic agents in COVID-19 patients and persons vaccinated against SARS-CoV-2*. Vol. 1.0. 2021. April 29, 2021. <http://www.encepp.eu/documents/BACKGROUNDRATESOFEVENTSOFINTEREST.pdf>
